# Supplementary material for: Beyond the Plate: Uncovering Inequalities in Fruit and Vegetable Intake across Indonesian Districts
Source: MDPI journal article supplement (doi:10.3390/nu15092160), 2023-04-30
Supplement: s1 [file s1]

**Figure S1.** Map of provinces in Indonesia

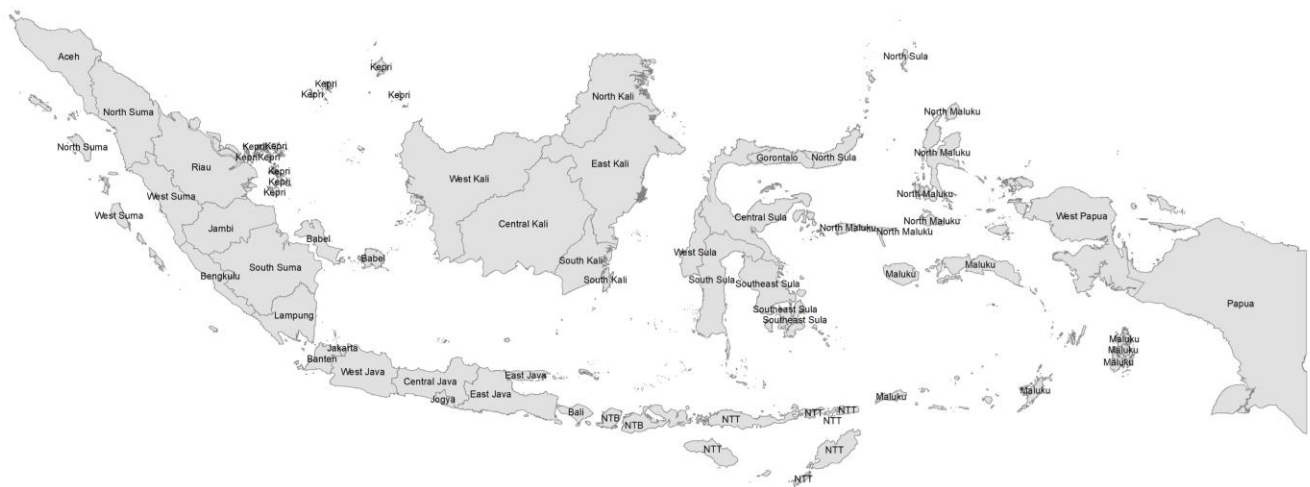

*Note: Suma=Sumatera, Kepri=Riau Islands, Sula=Sulawesi, Kali=Kalimantan, NTB=West Nusa Tenggara, NTT=East Nusa Tenggara. We divided the provinces into five regions including Sumatera, Java/Bali, Kalimantan, Sulawesi, and Papua/Maluku/Nusa Tenggara. Java/Bali is the most developed and Papua/Maluku/Nusa Tenggara is the least developed. We obtained the shapefile from the Indonesian Information and Geospatial Agency and created the map in ArcMap 10.*

**Figure S2.** Map of Districts by urbanicity, income level, and educational level

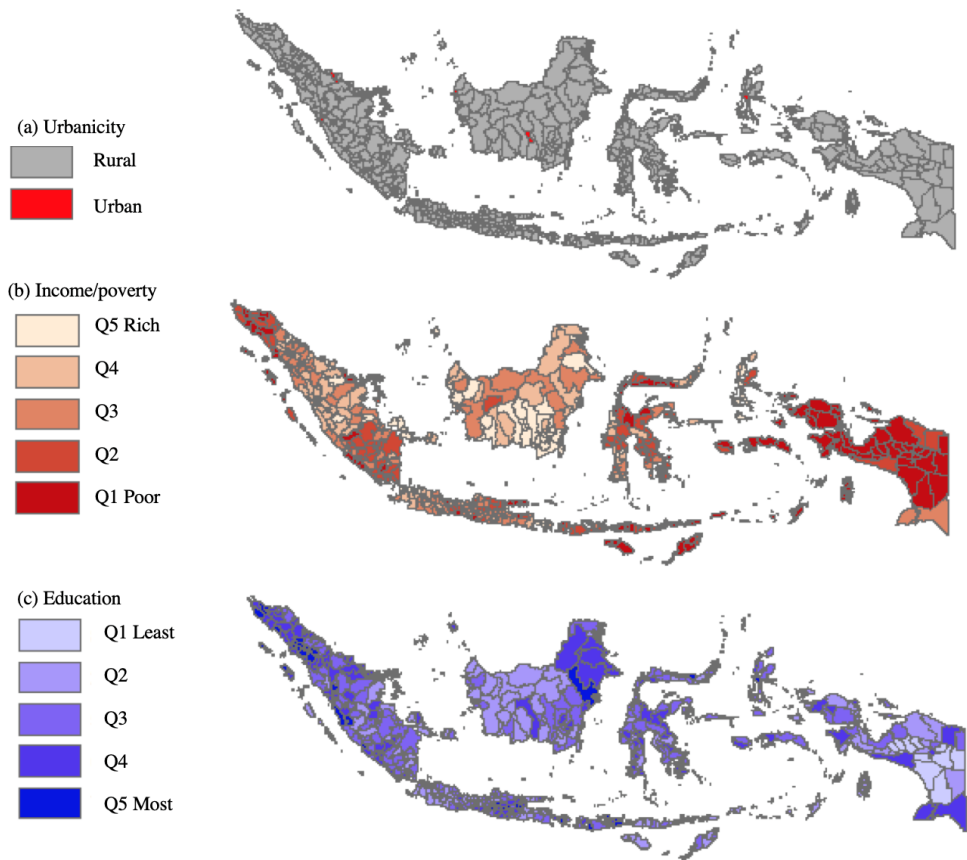

**Table S1.** Urban sample and educational/poverty level by urbanicity and region

(a)

| Urbanicity | Sample<br>N (%) | Education enrolment<br>ratio (%) | Poverty rates<br>(%) |
|------------|-----------------|----------------------------------|----------------------|
| Urban      | 97 (18.9)       | 68.5                             | 6.9                  |
| Rural      | 417 (81.1)      | 59.6                             | 13.6                 |
| Total      | 514 (100)       | 61.3                             | 12.3                 |

(b)

| Region     | Urban<br>(%) | Education enrolment<br>ratio (%) | Poverty rates<br>(%) |
|------------|--------------|----------------------------------|----------------------|
| Papua      | 9.5          | 53.8                             | 22.6                 |
| Sulawesi   | 13.6         | 61.4                             | 11.6                 |
| Kalimantan | 16.1         | 57.2                             | 6.3                  |
| Sumatera   | 21.4         | 66.2                             | 11.2                 |
| Java       | 27.3         | 62.6                             | 9.3                  |
| Total      | 61.3         | 61.3                             | 12.3                 |

**Table S2. Ten districts with LOWEST prevalence of inadequate FV intake in Indonesia, 2018**

|                      | Prevalence | Province           | Region     | Urban | Poverty    | Education  | Pop (000)  |
|----------------------|------------|--------------------|------------|-------|------------|------------|------------|
| (a) All adults       |            |                    |            |       |            |            |            |
| Kab. Kolaka Timur    | 70.1%      | Southeast Sulawesi | Sulawesi   | Rural | 14%        | 64%        | 178        |
| Nagekeo              | 75.4%      | East Nusa Tenggara | Papua      | Rural | 13%        | 51%        | 139        |
| Kab. Tambrau         | 76.8%      | West Papua         | Papua      | Rural | 35%        | 47%        | 14         |
| Kab. Tuban           | 77.9%      | East Java          | Java       | Rural | 15%        | 56%        | 1152       |
| Kab. Sorong          | 81.1%      | West Papua         | Papua      | Rural | 30%        | 66%        | 80         |
| Kota Sibolga         | 82.7%      | North Sumatera     | Sumatera   | Urban | 12%        | 74%        | 86         |
| Kab. Ngada           | 82.8%      | East Nusa Tenggara | Papua      | Rural | 13%        | 61%        | 155        |
| Kota Pontianak       | 83.5%      | West Kalimantan    | Kalimantan | Urban | 5%         | 61%        | 607        |
| Kab. Lembata         | 84.5%      | East Nusa Tenggara | Papua      | Rural | 26%        | 51%        | 132        |
| Kab. Mambramo Tengah | 85.1%      | Papua              | Papua      | Rural | 37%        | 54%        | 46         |
| AVERAGE              |            |                    |            |       | <b>20%</b> | <b>59%</b> | <b>259</b> |
| (b) Male adults      |            |                    |            |       |            |            |            |
| Kab. Kolaka Timur    | 71%        | Southeast Sulawesi | Sulawesi   | Rural | 14%        | 64%        | 178        |
| Kab. Tambrau         | 71%        | West Papua         | Papua      | Rural | 35%        | 47%        | 14         |
| Kab. Sorong          | 77%        | West Papua         | Papua      | Rural | 30%        | 66%        | 80         |
| Nagekeo              | 78%        | East Nusa Tenggara | Papua      | Rural | 13%        | 51%        | 139        |
| Kab. Tuban           | 80%        | East Java          | Java       | Rural | 15%        | 56%        | 1152       |
| Kab. Mambramo Tengah | 83%        | Papua              | Papua      | Rural | 37%        | 54%        | 46         |
| Kota Pontianak       | 84%        | West Kalimantan    | Kalimantan | Urban | 5%         | 61%        | 607        |
| Kota Sibolga         | 84.5%      | North Sumatera     | Sumatera   | Urban | 12%        | 74%        | 86         |
| Kab. Lembata         | 84.8%      | East Nusa Tenggara | Papua      | Rural | 26%        | 51%        | 132        |
| Kab. Ngada           | 85.2%      | East Nusa Tenggara | Papua      | Rural | 13%        | 61%        | 155        |
| AVERAGE              |            |                    |            |       | <b>20%</b> | <b>59%</b> | <b>259</b> |
| (c) Female adults    |            |                    |            |       |            |            |            |
| Kab. Kolaka Timur    | 69%        | Southeast Sulawesi | Sulawesi   | Rural | 14%        | 64%        | 178        |
| Nagekeo              | 73%        | East Nusa Tenggara | Papua      | Rural | 13%        | 51%        | 139        |
| Kab. Tuban           | 76%        | East Java          | Java       | Rural | 15%        | 56%        | 1152       |
| Kab. Ngada           | 81%        | East Nusa Tenggara | Papua      | Rural | 13%        | 61%        | 155        |
| Kota Sibolga         | 80.9%      | North Sumatera     | Sumatera   | Urban | 12%        | 74%        | 86         |
| Kab. Tambrau         | 82.8%      | West Papua         | Papua      | Rural | 35%        | 47%        | 14         |
| Kota Pontianak       | 83.0%      | West Kalimantan    | Kalimantan | Urban | 5%         | 61%        | 607        |
| Kab. Lembata         | 84.3%      | East Nusa Tenggara | Papua      | Rural | 26%        | 51%        | 132        |
| Kab. Konawe Utara    | 84.9%      | Southeast Sulawesi | Sulawesi   | Rural | 14%        | 54%        | 58         |
| Kab. Buru            | 85.2%      | Maluku             | Papua      | Rural | 17%        | 62%        | 128        |
| AVERAGE              |            |                    |            |       | <b>16%</b> | <b>58%</b> | <b>265</b> |
| (d) Young adults     |            |                    |            |       |            |            |            |
| Kab. Kolaka Timur    | 67%        | Southeast Sulawesi | Sulawesi   | Rural | 14%        | 64%        | 178        |
| Kab. Tambrau         | 72%        | West Papua         | Papua      | Rural | 35%        | 47%        | 14         |
| Nagekeo              | 77%        | East Nusa Tenggara | Papua      | Rural | 13%        | 51%        | 139        |
| Kab. Sorong          | 78%        | West Papua         | Papua      | Rural | 30%        | 66%        | 80         |
| Kab. Ngada           | 80%        | East Nusa Tenggara | Papua      | Rural | 13%        | 61%        | 155        |
| Kab. Maybrat         | 80%        | West Papua         | Papua      | Rural | 33%        | 69%        | 37         |
| Kab. Tuban           | 81%        | East Java          | Java       | Rural | 15%        | 56%        | 1152       |
| Kab. Konawe Utara    | 84%        | Southeast Sulawesi | Sulawesi   | Rural | 14%        | 54%        | 58         |
| Kota Pontianak       | 84%        | West Kalimantan    | Kalimantan | Urban | 5%         | 61%        | 607        |
| Kab. Kaimana         | 85%        | West Papua         | Papua      | Rural | 17%        | 52%        | 54         |
| AVERAGE              |            |                    |            |       | <b>19%</b> | <b>58%</b> | <b>247</b> |
| (e) Adults           |            |                    |            |       |            |            |            |
| Kab. Kolaka Timur    | 69.1%      | Southeast Sulawesi | Sulawesi   | Rural | 14%        | 64%        | 178        |
| Kab. Tuban           | 75.1%      | East Java          | Java       | Rural | 15%        | 56%        | 1152       |
| Nagekeo              | 75.6%      | East Nusa Tenggara | Papua      | Rural | 13%        | 51%        | 139        |
| Kab. Tambrau         | 77.8%      | West Papua         | Papua      | Rural | 35%        | 47%        | 14         |
| Kab. Sorong          | 81.3%      | West Papua         | Papua      | Rural | 30%        | 66%        | 80         |
| Kota Sibolga         | 82.7%      | North Sumatera     | Sumatera   | Urban | 12%        | 74%        | 86         |
| Kab. Ngada           | 82.9%      | East Nusa Tenggara | Papua      | Rural | 13%        | 61%        | 155        |
| Kota Pontianak       | 83.0%      | West Kalimantan    | Kalimantan | Urban | 5%         | 61%        | 607        |

|                      |       |                    |          |       |            |            |            |
|----------------------|-------|--------------------|----------|-------|------------|------------|------------|
| Kab. Lembata         | 83.0% | East Nusa Tenggara | Papua    | Rural | 26%        | 51%        | 132        |
| Kab. Mambramo Tengah | 84.4% | Papua              | Papua    | Rural | 37%        | 54%        | 46         |
| AVERAGE              |       |                    |          |       | <b>20%</b> | <b>59%</b> | <b>259</b> |
| (f) Older adults     |       |                    |          |       |            |            |            |
| Kota Sibolga         | 72.2% | North Sumatera     | Sumatera | Urban | 12%        | 74%        | 86         |
| Nagekeo              | 73.8% | East Nusa Tenggara | Papua    | Rural | 13%        | 51%        | 139        |
| Kab. Buru            | 74.9% | Maluku             | Papua    | Rural | 17%        | 62%        | 128        |
| Kab. Tambrauw        | 78.1% | West Papua         | Papua    | Rural | 35%        | 47%        | 14         |
| Kab. Teluk Bintuni   | 80.0% | West Papua         | Papua    | Rural | 31%        | 56%        | 59         |
| Kab. Keerom          | 80.1% | Papua              | Papua    | Rural | 17%        | 61%        | 54         |
| Kab. Kolaka Timur    | 81.2% | Southeast Sulawesi | Sulawesi | Rural | 14%        | 64%        | 178        |
| Kota Padang Panjang  | 84.5% | West Sumatera      | Sumatera | Urban | 6%         | 74%        | 51         |
| Kab. Sorong          | 84.6% | West Papua         | Papua    | Rural | 30%        | 66%        | 80         |
| Kota Mataram         | 84.7% | West Nusa Tenggara | Papua    | Urban | 9%         | 74%        | 449        |
| AVERAGE              |       |                    |          |       | <b>18%</b> | <b>63%</b> | <b>124</b> |

*Note: FV=fruit & vegetable, Urban=City, Rural=Regency; Pop=Population. The districts are ordered by prevalence (column 1).*

**Table S3. Ten districts with HIGHEST prevalence of inadequate FV intake in Indonesia, 2018**

|                         | Prevalence | Province           | Region     | Urban | Poverty    | Education  | Pop<br>(000) |
|-------------------------|------------|--------------------|------------|-------|------------|------------|--------------|
| (a) All adults          |            |                    |            |       |            |            |              |
| Kab. Mamasa             | 99.9%      | West Sulawesi      | Sulawesi   | Rural | 13%        | 66%        | 152          |
| Kab. Pangkep            | 99.9%      | South Sulawesi     | Sulawesi   | Rural | 15%        | 59%        | 323          |
| Kab. Simalungun         | 100.0%     | North Sumatera     | Sumatera   | Rural | 9%         | 63%        | 849          |
| Kab. Nias Utara         | 100.0%     | North Sumatera     | Sumatera   | Rural | 27%        | 73%        | 134          |
| Kab. Konawe Kepulauan   | 100.0%     | Southeast Sulawesi | Sulawesi   | Rural | 17%        | 63%        | 32           |
| Kab. Buton Selatan      | 100.0%     | Southeast Sulawesi | Sulawesi   | Rural | 15%        | 44%        | 77           |
| Kab. Yahukimo           | 100.0%     | Papua              | Papua      | Rural | 39%        | 12%        | 181          |
| Kab. Tolikara           | 100.0%     | Papua              | Papua      | Rural | 33%        | 34%        | 131          |
| Kab. Dogiyai            | 100.0%     | Papua              | Papua      | Rural | 30%        | 39%        | 92           |
| Kab. Diyai              | 100.0%     | Papua              | Papua      | Rural | 43%        | 51%        | 69           |
| AVERAGE                 |            |                    |            |       | <b>24%</b> | <b>51%</b> | <b>204</b>   |
| (b) Male adults         |            |                    |            |       |            |            |              |
| Kab. Simalungun         | 100.0%     | North Sumatera     | Sumatera   | Rural | 9%         | 63%        | 849          |
| Kab. Nias Utara         | 100.0%     | North Sumatera     | Sumatera   | Rural | 27%        | 73%        | 134          |
| Kab. Kerinci            | 100.0%     | Jambi              | Sumatera   | Rural | 7%         | 77%        | 235          |
| Kab. Batang Hari        | 100.0%     | Jambi              | Sumatera   | Rural | 10%        | 66%        | 260          |
| Kab. Tanah Tidung       | 100.0%     | North Kalimantan   | Kalimantan | Rural | 5%         | 45%        | 22           |
| Kab. Konawe Kepulauan   | 100.0%     | Southeast Sulawesi | Sulawesi   | Rural | 17%        | 63%        | 32           |
| Kab. Buton Selatan      | 100.0%     | Southeast Sulawesi | Sulawesi   | Rural | 15%        | 44%        | 77           |
| Kab. Sorong Selatan     | 100.0%     | West Papua         | Papua      | Rural | 19%        | 56%        | 43           |
| Kab. Yahukimo           | 100.0%     | Papua              | Papua      | Rural | 39%        | 12%        | 181          |
| Kab. Tolikara           | 100.0%     | Papua              | Papua      | Rural | 33%        | 34%        | 131          |
| Kab. Mambero Raya       | 100.0%     | Papua              | Papua      | Rural | 30%        | 51%        | 21           |
| Kab. Puncak             | 100.0%     | Papua              | Papua      | Rural | 38%        | 9%         | 103          |
| Kab. Dogiyai            | 100.0%     | Papua              | Papua      | Rural | 30%        | 39%        | 92           |
| Kab. Diyai              | 100.0%     | Papua              | Papua      | Rural | 43%        | 51%        | 69           |
| AVERAGE                 |            |                    |            |       | <b>23%</b> | <b>49%</b> | <b>161</b>   |
| (c) Female adults       |            |                    |            |       |            |            |              |
| Kab. Simalungun         | 100.0%     | North Sumatera     | Sumatera   | Rural | 9%         | 63%        | 849          |
| Kab. Padang Lawas Utara | 100.0%     | North Sumatera     | Sumatera   | Rural | 10%        | 69%        | 252          |
| Kab. Nias Utara         | 100.0%     | North Sumatera     | Sumatera   | Rural | 27%        | 73%        | 134          |
| Kab. Balangan           | 100.0%     | South Kalimantan   | Kalimantan | Rural | 6%         | 65%        | 123          |
| Kab. Konawe Kepulauan   | 100.0%     | Southeast Sulawesi | Sulawesi   | Rural | 17%        | 63%        | 32           |
| Kab. Buton Selatan      | 100.0%     | Southeast Sulawesi | Sulawesi   | Rural | 15%        | 44%        | 77           |
| Kab. Mamasa             | 100.0%     | West Sulawesi      | Sulawesi   | Rural | 13%        | 66%        | 152          |
| Kab. Asmat              | 100.0%     | Papua              | Papua      | Rural | 27%        | 21%        | 88           |
| Kab. Yahukimo           | 100.0%     | Papua              | Papua      | Rural | 39%        | 12%        | 181          |
| Kab. Tolikara           | 100.0%     | Papua              | Papua      | Rural | 33%        | 34%        | 131          |
| Kab. Dogiyai            | 100.0%     | Papua              | Papua      | Rural | 30%        | 39%        | 92           |
| Kab. Diyai              | 100.0%     | Papua              | Papua      | Rural | 43%        | 51%        | 69           |
| AVERAGE                 |            |                    |            |       | <b>23%</b> | <b>50%</b> | <b>182</b>   |
| (d) Young adults        |            |                    |            |       |            |            |              |
| Kab. Jayawijaya         | 100.0%     | Papua              | Papua      | Rural | 39%        | 67%        | 206          |
| Kab. Paniai             | 100.0%     | Papua              | Papua      | Rural | 37%        | 25%        | 164          |
| Kab. Asmat              | 100.0%     | Papua              | Papua      | Rural | 27%        | 21%        | 88           |
| Kab. Yahukimo           | 100.0%     | Papua              | Papua      | Rural | 39%        | 12%        | 181          |
| Kab. Tolikara           | 100.0%     | Papua              | Papua      | Rural | 33%        | 34%        | 131          |
| Kab. Waropen            | 100.0%     | Papua              | Papua      | Rural | 31%        | 61%        | 28           |
| Kab. Mambero Raya       | 100.0%     | Papua              | Papua      | Rural | 30%        | 51%        | 21           |
| Kab. Puncak             | 100.0%     | Papua              | Papua      | Rural | 38%        | 9%         | 103          |
| Kab. Dogiyai            | 100.0%     | Papua              | Papua      | Rural | 30%        | 39%        | 92           |
| Kab. Diyai              | 100.0%     | Papua              | Papua      | Rural | 43%        | 51%        | 69           |
| AVERAGE                 |            |                    |            |       | <b>35%</b> | <b>37%</b> | <b>108</b>   |
| (e) Adults              |            |                    |            |       |            |            |              |
| Kab. Mamasa             | 99.9%      | West Sulawesi      | Sulawesi   | Rural | 13%        | 66%        | 152          |

|                       |        |                    |          |       |            |            |            |
|-----------------------|--------|--------------------|----------|-------|------------|------------|------------|
| Kab. Pangkep          | 100.0% | South Sulawesi     | Sulawesi | Rural | 15%        | 59%        | 323        |
| Kab. Simalungun       | 100.0% | North Sumatera     | Sumatera | Rural | 9%         | 63%        | 849        |
| Kab. Nias Utara       | 100.0% | North Sumatera     | Sumatera | Rural | 27%        | 73%        | 134        |
| Kab. Konawe Kepulauan | 100.0% | Southeast Sulawesi | Sulawesi | Rural | 17%        | 63%        | 32         |
| Kab. Buton Selatan    | 100.0% | Southeast Sulawesi | Sulawesi | Rural | 15%        | 44%        | 77         |
| Kab. Yahukimo         | 100.0% | Papua              | Papua    | Rural | 39%        | 12%        | 181        |
| Kab. Tolikara         | 100.0% | Papua              | Papua    | Rural | 33%        | 34%        | 131        |
| Kab. Dogiyai          | 100.0% | Papua              | Papua    | Rural | 30%        | 39%        | 92         |
| Kab. Diyai            | 100.0% | Papua              | Papua    | Rural | 43%        | 51%        | 69         |
| AVERAGE               |        |                    |          |       | <b>24%</b> | <b>51%</b> | <b>204</b> |

(f) Older adults

|                       |        |                    |            |       |            |            |            |
|-----------------------|--------|--------------------|------------|-------|------------|------------|------------|
| Kab. Mambramo Raya    | 100.0% | Papua              | Papua      | Rural | 30%        | 51%        | 21         |
| Kab. Sorong Selatan   | 100.0% | West Papua         | Papua      | Rural | 19%        | 56%        | 43         |
| Kab. Manowari Selatan | 100.0% | West Papua         | Papua      | Rural | 31%        | 47%        | 22         |
| Kab. Kerinci          | 100.0% | Jambi              | Sumatera   | Rural | 7%         | 77%        | 235        |
| Kab. Buton Selatan    | 100.0% | Southeast Sulawesi | Sulawesi   | Rural | 15%        | 44%        | 77         |
| Kab. Puncak Jaya      | 100.0% | Papua              | Papua      | Rural | 36%        | 21%        | 115        |
| Kab. Sintang          | 100.0% | West Kalimantan    | Kalimantan | Rural | 10%        | 45%        | 396        |
| Kab. Anambas Kep      | 100.0% | Riau Islands       | Sumatera   | Rural | 7%         | 77%        | 40         |
| Kab. Sijunjung        | 100.0% | West Sumatera      | Sumatera   | Rural | 7%         | 59%        | 222        |
| Kab. Halmahera Tengah | 100.0% | North Maluku       | Papua      | Rural | 14%        | 63%        | 50         |
| Kab. Boven Digul      | 100.0% | Papua              | Papua      | Rural | 20%        | 35%        | 63         |
| Kab. Padang Pariaman  | 100.0% | West Sumatera      | Sumatera   | Rural | 8%         | 72%        | 406        |
| Sabu Raijua           | 100.0% | East Nusa Tenggara | Papua      | Rural | 31%        | 69%        | 86         |
| Kab Aceh Tamiang      | 100.0% | Aceh               | Sumatera   | Rural | 14%        | 66%        | 278        |
| kab. Tanah Bumbu      | 100.0% | South Kalimantan   | Kalimantan | Rural | 5%         | 62%        | 324        |
| AVERAGE               |        |                    |            |       | <b>17%</b> | <b>56%</b> | <b>159</b> |

*Note: FV=fruit & vegetable, Urban=City, Rural=Regency; Pop=Population. The districts are ordered by prevalence (column 1).*

**Table S4.** Regression outputs for urban/rural differences

|              | Inadequate FV intake |               |                 |                   |                   |                 |
|--------------|----------------------|---------------|-----------------|-------------------|-------------------|-----------------|
|              | All adults<br>Coef   | Males<br>Coef | Females<br>Coef | 18-24 yrs<br>Coef | 25-59 yrs<br>Coef | 60+ yrs<br>Coef |
| Rural        | Reference            |               |                 |                   |                   |                 |
| Urban        | -0.70                | -0.36         | -1.04*          | 0.45              | -0.85             | -1.81**         |
| Constant     | 96.48**              | 96.72**       | 96.24**         | 96.95**           | 96.29**           | 96.99**         |
| Observations | 514                  | 514           | 514             | 514               | 514               | 514             |
| R-squared    | 0.01                 | 0.00          | 0.01            | 0.00              | 0.01              | 0.03            |

Note: FV=fruit & vegetable, Coef = OLS Coefficient; Significance level \*\* p<0.01, \* p<0.05
